# Supplementary material for: Spatial distribution, diversity, and taphonomy of clypeasteroid and spatangoid echinoids of the central Florida Keys
Source: PeerJ. 2022 Oct 31;10:e14245. doi: 10.7717/peerj.14245 (PMC9632462; doi:10.7717/peerj.14245)
Supplement: Supplemental Information 1 — Ordinal rank codes are numerical codes X.Y, where X is the ordinal rank for live specimens and Y is the ordinal rank for dead specimens. For example, a value of 2.1 for a given taxon means that the live specimens of that taxon were common (rank = 2) and dead remains were present (rank = 1). [file peerj-10-14245-s001.csv]

Site	Depth_ft	latitude	longitude	sediment	method	Leodia sexiesperforata	Clypeaster subdepressus	Clypeaster rosaceous	Encope michelini	Meoma ventricosa	Plagiobrissus grandis	sand dollar indet	key
1	75	24.6655	-80.97505	NA	sf	0	0.1	0	0	1.1	0	0	NA=data not available
2	43	24.659933	-80.993233	NA	sf	0	0	0	0	2	0	0	sf=timed search
3	6	24.78605	-80.882867	NA	sf	1.1	0	0	0.1	0	0	0
4	91	24.72996	-80.79903	NA	sf	0	0	0	0	0	0	0
5	28	24.74398	-80.79883	NA	sf	3.1	1	0	0.1	0	1	0
6	7	24.78442	-80.88084	NA	sf	0	0	0	0	0	0	0
7	92	24.76377	-80.73309	NA	sf	0	0	0	0	0	0	0
8	27	24.77108	-80.79357	sand with sparse sea grass, open sand patches between sparse sea grass	sf	0	0.1	3.1	0	2	0	0
9	27	24.74689	-80.79453	open sand flatssand	sf	1	0	1	1.1	1.1	1	0
10	123	24.66115	-80.96268	coarse sand	sf	0	1	0	0	0	0	0
11	86	24.67109	-80.95305	finer sand/muddy	sf	0	0	0	0	0	0	0
12	35	24.70682	-80.91486	sand flats with patches of Halimeda and sea grass	sf	0	0	0	0	1	0	1
13	11	24.78195	-80.87997	sand flats, finer sand, patchy sea grass meadows	sf	1	0	0	0	0	0	0
14	116	24.75892	-80.73144	sand flats with algal overgrowth	sf	0	0	0	0	0	0	0
15	98	24.75693	-80.74518	sand flat, slope on reef	sf	0	0	0	0	0	0	0
16	20	24.78448	-80.79025	sand flats with sea grass/algae patches	sf	1	0	3.1	0	0	0	0
17	20	24.81612	-80.73525	sand flat with sea grass / algae patches	sf	2	0	0	0	0	0	0
18	114	24.71854	-80.81877	coarse sand / fine coral rubble	sf	0	0	0	0	0	0	0
19	24	24.73364	-80.82657	sand flats	sf	0	0	0	0	3	0	0
20	107	24.7311	-80.78908	sand with algae	sf	0	0	0	0	0	0	0
21	42	24.74167	-80.78215	sand	sf	1	0	0	0	3.3	0.1	0
22	25	24.73458	-80.84093	NA	sf	0	0	0	0	0	0	0.1
23	12	24.797883	-80.869317	sand with sea grass	sf	0	0	3.3	0	0	0	0
24	8	24.84421	-80.86381	sand with sea grass/algae	sf	0	0	0	0	0	0	0
25	115	24.77878	-80.69963	sand with algae	sf	0	0	0	0	3	0	0
26	50	24.79014	-80.69575	NA	sf	1.2	1.2	0	0	0	0.1	1
27	115	24.69755	-80.869317	NA	sf	0	0	0	0	2	0	0
